# Supplementary material for: A visual and organic vapor sensitive photonic crystal sensor consisting of polymer-infiltrated SiO2 inverse opal
Source: Royal Society of Chemistry journal article supplement (doi:10.1039/c4cp06019a), 2015-01-01
Supplement: c4cp06019a1.pdf [file c4cp06019a1.pdf]

## Electronic Supplementary Information

### A visual and organic vapors sensitive photonic crystal sensor by polymer-infiltrated SiO<sub>2</sub> inverse opal

Yuqi Zhang,<sup>a</sup> Jianhua Qiu,<sup>a</sup> Rongrong Hu,<sup>c</sup> Pei Li,<sup>a</sup> Loujun Gao,<sup>a</sup> Liping Heng<sup>b\*</sup> Ben  
Zhong Tang,<sup>c</sup> and Lei Jiang<sup>b</sup>

<sup>a</sup> College of Chemistry and Chemical Engineering, Yan'an University, Yan'an, Shaanxi, 716000, P. R. China.

<sup>b</sup> School of Chemistry and Environment, Beihang University, 100191, P. R. China.

Fax: (+86) 10- 8262 7566 E-mail: henglp@iccas.ac.cn

<sup>c</sup> Departments of Chemistry, Hong Kong University of Science and Technology, Clear Water Bay, Kowloon, Hong Kong, P. R. China.

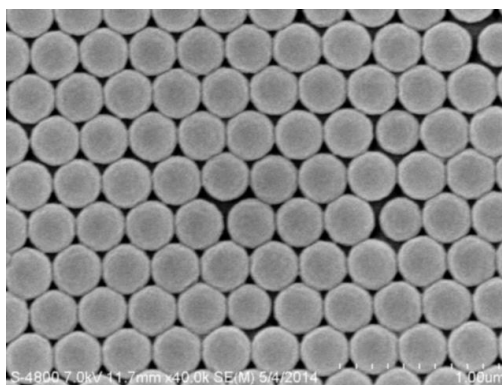

**Fig. S1** SEM image of poly (styrene-acrylic acid) microspheres. The average diameter is 340 nm.

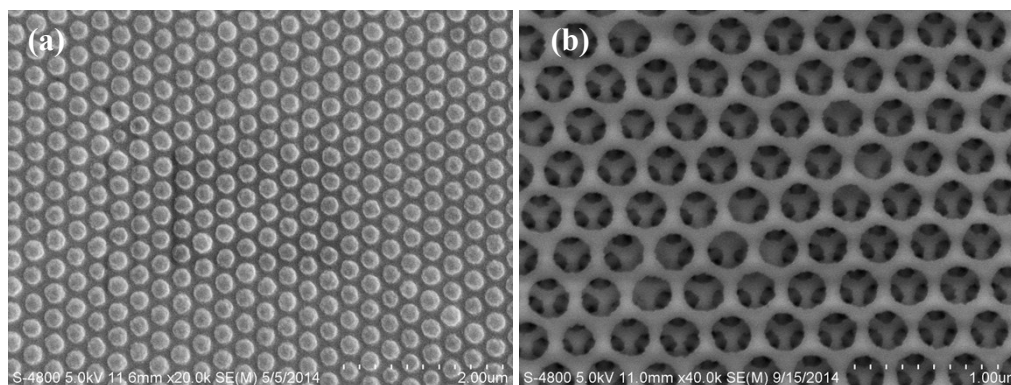

**Fig. S2** SEM images of the co-assembly PC film (a) of P(St-AA) microspheres and SiO<sub>2</sub> precursor colloidal crystal, and SiO<sub>2</sub> IOPC (b).

**Table S1** The refractive indices ( $n_D^{20}$ ) of some solvents

| Solvents                   | $n_D^{20}$ |
|----------------------------|------------|
| Tetrahydrofuran            | 1.4072     |
| Acetone                    | 1.3587     |
| Benzene                    | 1.5011     |
| Toluene                    | 1.4969     |
| Diethyl ether              | 1.3524     |
| Chloroform                 | 1.4458     |
| Petroleum ether (60-90 °C) | 1.428      |
| Methanol                   | 1.3284     |
| Ethyl acetate              | 1.3724     |
| Ethanol                    | 1.3614     |
| H <sub>2</sub> O           | 1.3330     |

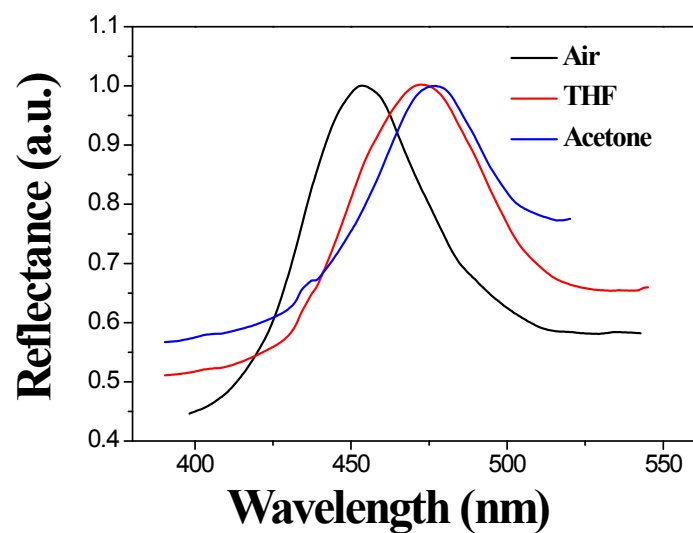

Fig. S3 The normalized reflectance spectra of PMMA-SiO<sub>2</sub> IOPC exposed to air, the saturated vapors of THF and acetone. There are the stopband shifts of 19 nm and 23 nm when exposed to the vapors of THF and acetone, respectively.

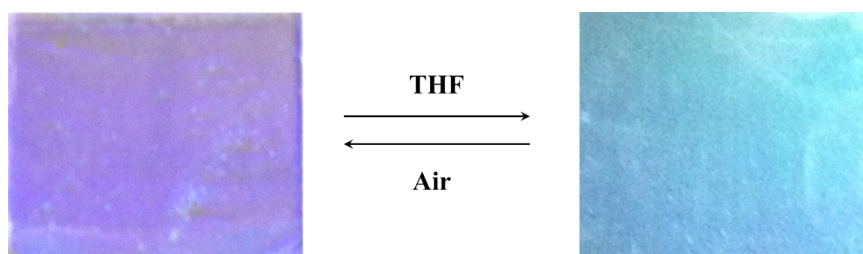

Fig. S4 The photographic images of TPEP-SiO<sub>2</sub> IOPC exposed to THF vapor and air.
